# Supplementary material
Source: publisher figshare collection journal article supplement (https://acs.figshare.com/ndownloader/files/28102248)
Supplement: Supplementary file 1 [file 28102248]

# Supporting Information for

## A Guide to Water Free Lithium Bis(oxalate) Borate (LiBOB)

*Ceren Zor<sup>a,‡</sup>, Yaprak Subaşı<sup>b,c,‡</sup>, Durata Hacıu<sup>b</sup>, Mehmet Somer<sup>b</sup> and Semih Afyon<sup>d,e\*</sup>*

<sup>a</sup>University of Oxford, Department of Materials, Oxford, OX1 3PH, United Kingdom.

<sup>b</sup>Koç University, Department of Chemistry, Sarıyer, Istanbul, 34450, Turkey.

<sup>c</sup>Koç University Boron and Advanced Materials Application and Research Center (KUBAM), Istanbul, 34450, Turkey.

<sup>d</sup>Gebze Technical University, Energy Technologies Institute, Gebze, Kocaeli, 41400, Turkey.

<sup>e</sup>Gebze Technical University, Department of Mechanical Engineering, Gebze, Kocaeli, 41400, Turkey.

\*Corresponding author:

E-mail: safyon@gtu.edu.tr,

<sup>‡</sup>C. Z. and Y. S. should be considered co-first authors.

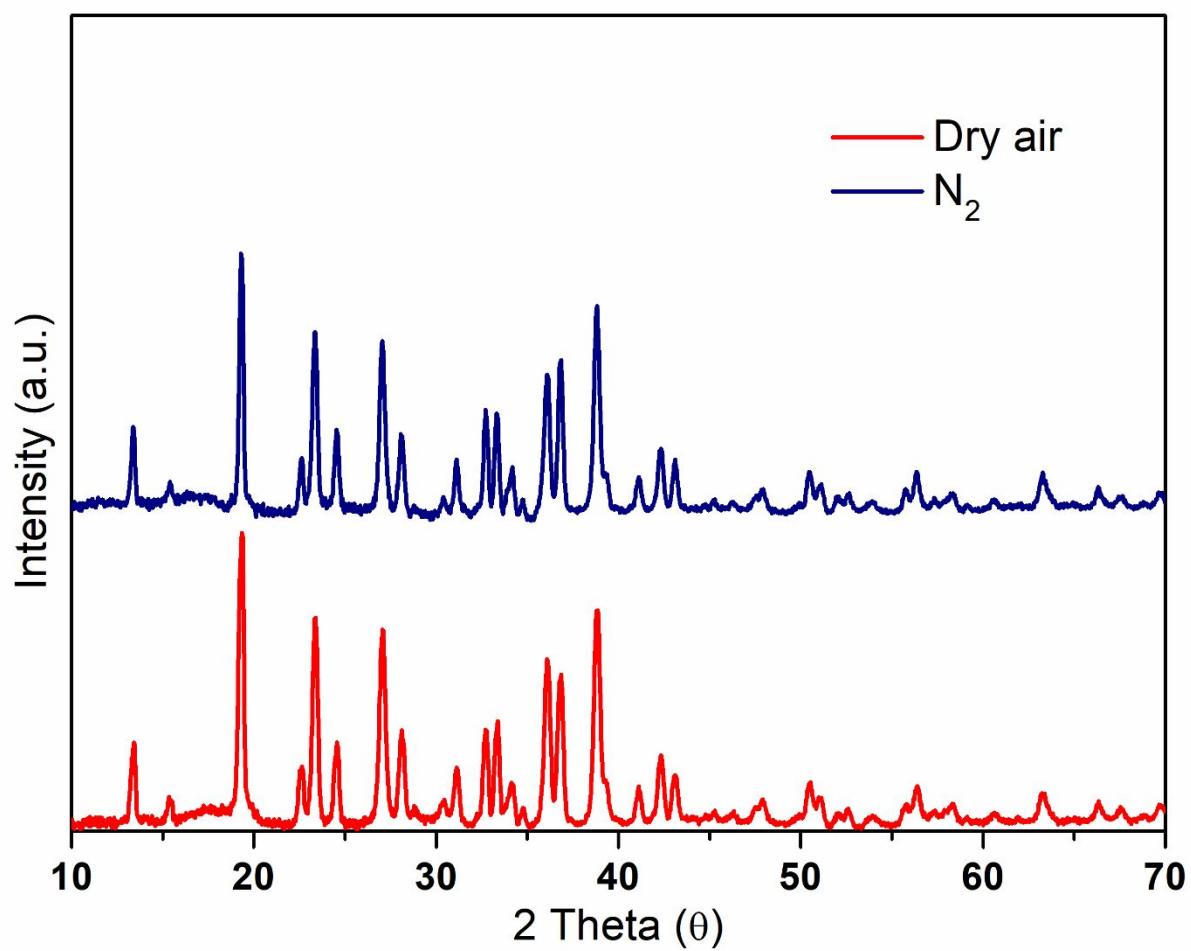

**Figure S1.** XPRD patterns of high purity anhydrous LiBOB synthesized using different protective gases (dry air and  $N_2$ ).

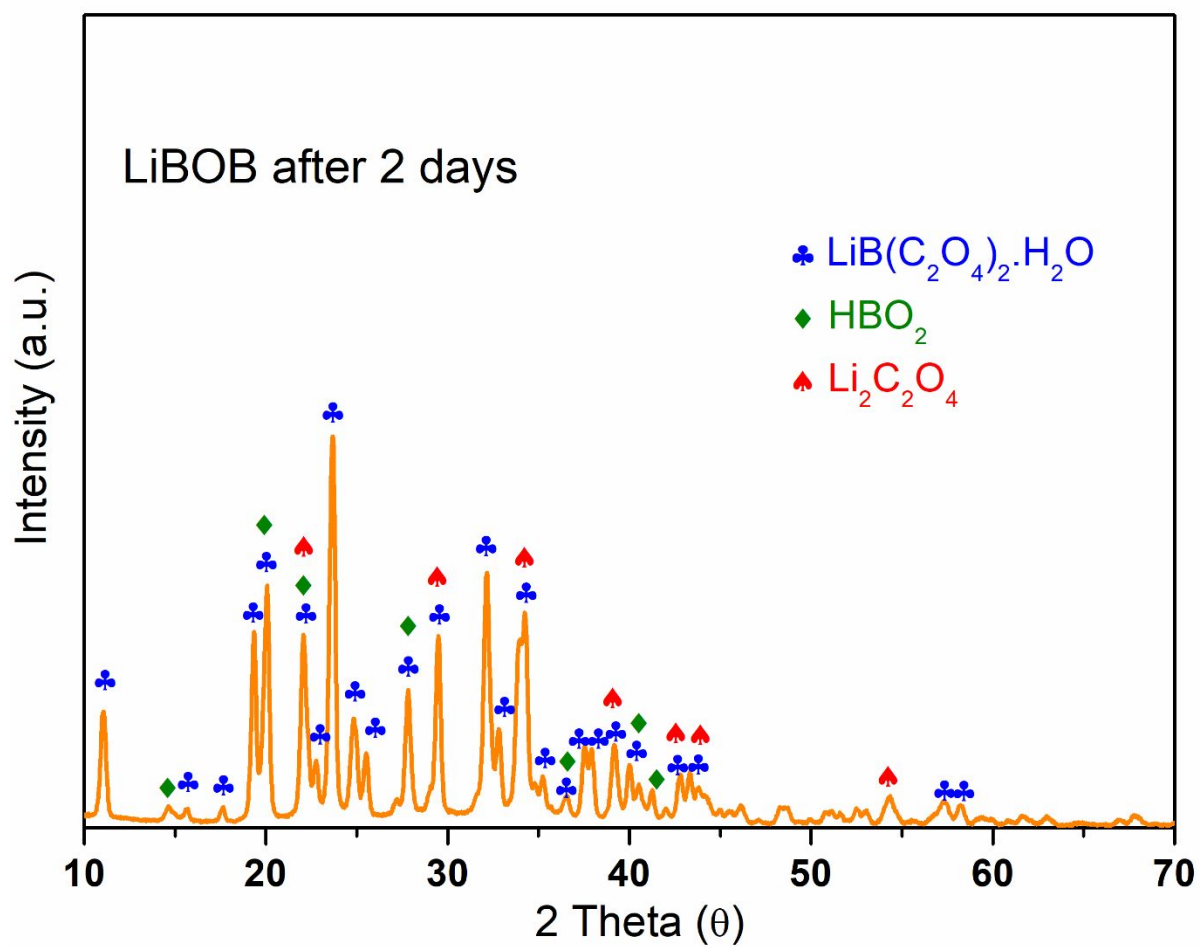

**Figure S2.** XRPD pattern showing crystalline water,  $\text{HBO}_2$ , and  $\text{Li}_2\text{C}_2\text{O}_4$  formation after aging the anhydrous LiBOB for 2 days under ambient conditions.

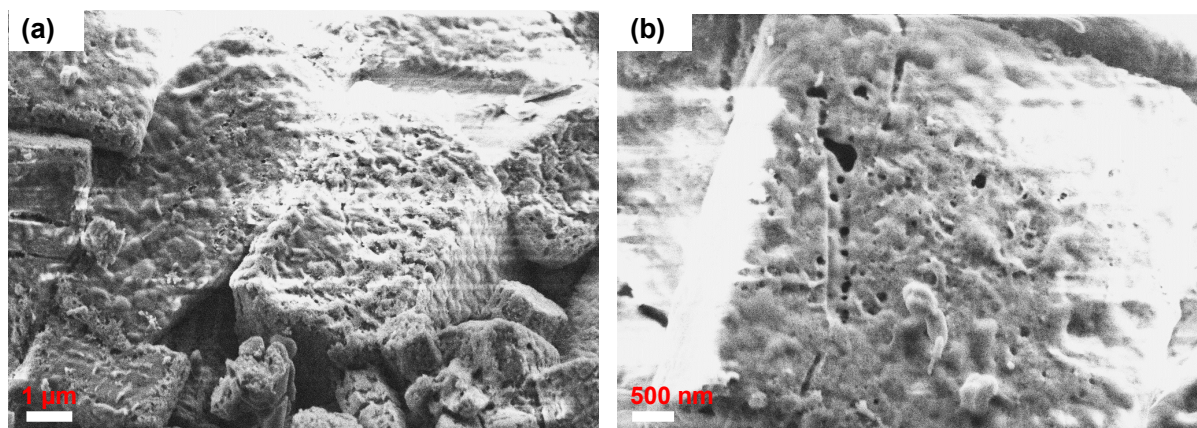

**Figure S3.** SEM micrographs for anhydrous LiBOB aged under ambient conditions showing changes in the prismatic morphology and formation of pores.

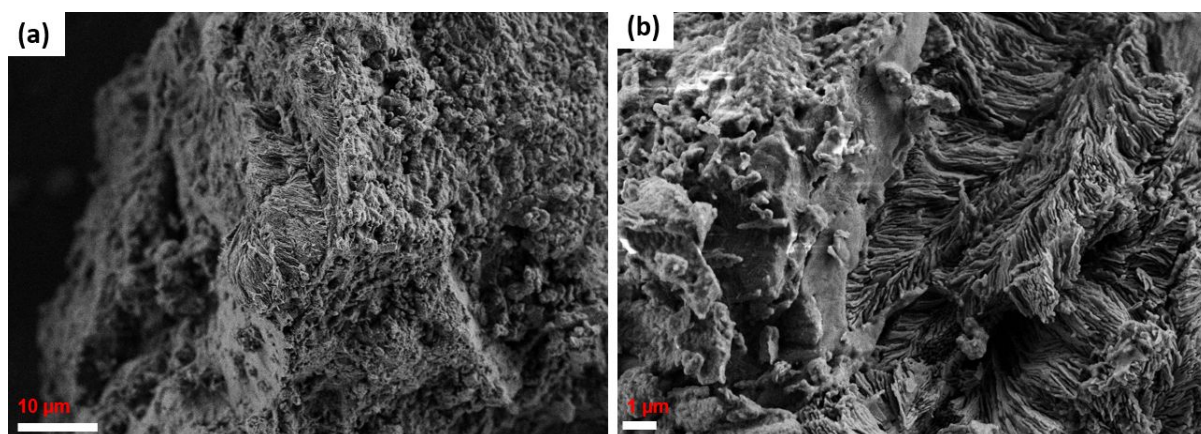

**Figure S4.** SEM micrographs showing the morphology of the products synthesized at 150-200 °C.

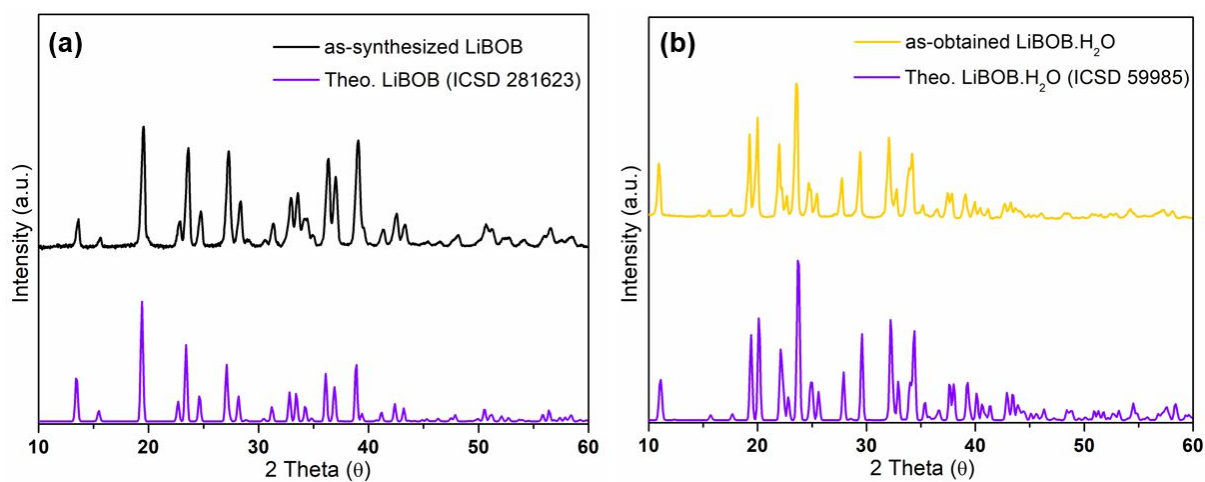

**Figure S5.** XRPD patterns of (a) theoretical anhydrous LiBOB (violet) and as-synthesized anhydrous LiBOB (black), (b) theoretical LiBOB.H<sub>2</sub>O (violet) and as-obtained LiBOB.H<sub>2</sub>O (30 mins air exposed sample) (yellow).

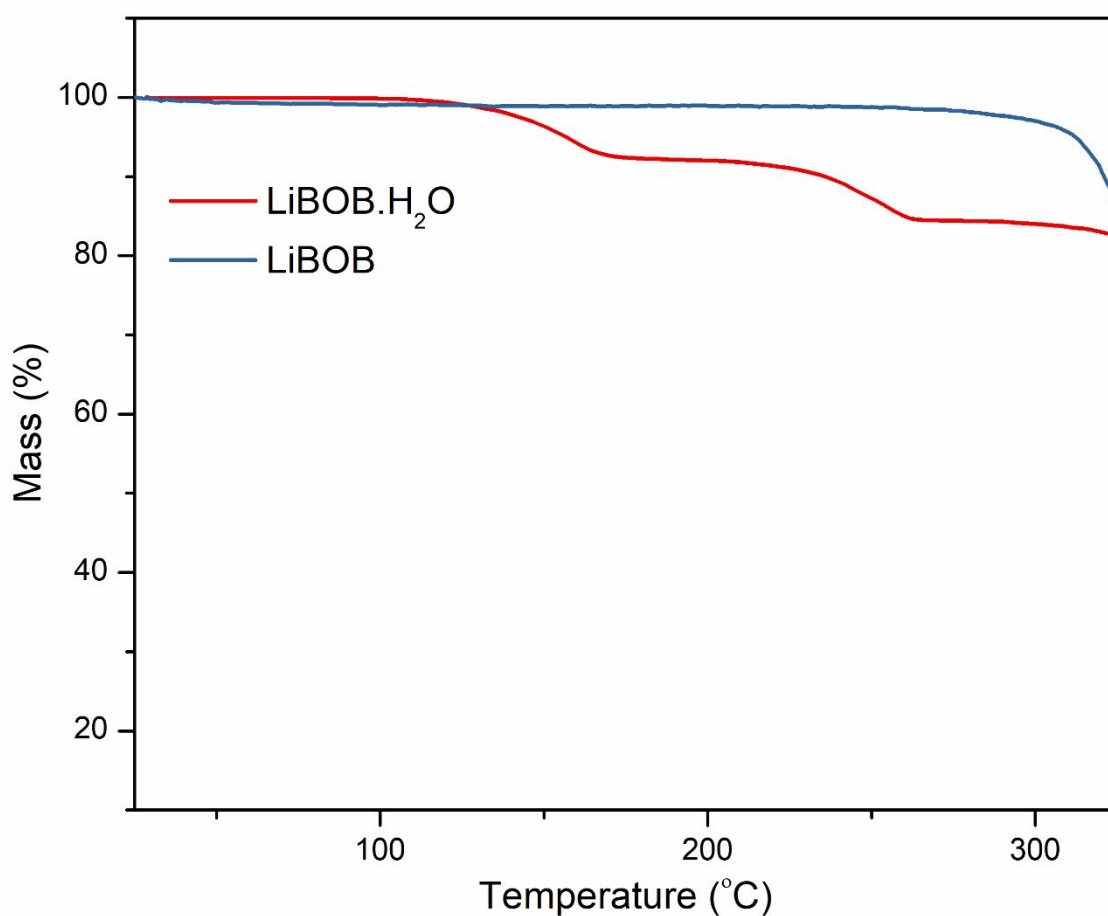

**Figure S6.** The comparison of TGA curves of the as-synthesized anhydrous LiBOB (blue), (b) LiBOB.H<sub>2</sub>O (red).
